# Supplementary material
Source: Royal Society of Chemistry journal article supplement (doi:10.1039/d5cp04574f)
Supplement: d5cp04574f6.pdf [file d5cp04574f6.pdf]

Table S1. System composition (waters and ions) used in simulations.

| System | Water molecules (TIP3) | Na <sup>+</sup> ions (SOD) | Cl <sup>-</sup> ions (CLA) |
|--------|------------------------|----------------------------|----------------------------|
| APO    | 19080                  | 67                         | 54                         |
| PIY    | 23123                  | 78                         | 65                         |
| AND    | 19080                  | 67                         | 54                         |
| EST    | 18440                  | 65                         | 52                         |
| TES    | 19093                  | 67                         | 54                         |

Table S2. Non-standard protonation states used in simulations.

Residue indices refer to the residue number (resnr) in the protein topology files (PROA\_\*.itp). Histidine tautomers were specified as HSD ( $\delta$ -protonated; equivalent to HID). No other non-standard protonation states (e.g., HSE/HSP, ASH/GLH, LYP) were used.

| System | Residue type | Non-standard state               | Residue indices (resnr in PROA.itp)                | Note                                        |
|--------|--------------|----------------------------------|----------------------------------------------------|---------------------------------------------|
| APO    | His          | HSD ( $\delta$ -protonated; HID) | 33, 47, 55, 103, 151, 158, 177, 248, 327, 343, 351 | CHARMM-GUI/force-field assignment at pH 7.4 |
| PIY    | His          | HSD ( $\delta$ -protonated; HID) | 33, 47, 55, 103, 151, 158, 177, 248, 327, 343, 351 | CHARMM-GUI/force-field assignment at pH 7.4 |
| AND    | His          | HSD ( $\delta$ -protonated; HID) | 33, 47, 55, 103, 151, 158, 177, 248, 327, 343, 351 | CHARMM-GUI/force-field assignment at pH 7.4 |
| EST    | His          | HSD ( $\delta$ -protonated; HID) | 33, 47, 55, 103, 151, 158, 177, 248, 327, 343, 351 | CHARMM-GUI/force-field assignment at pH 7.4 |
| TES    | His          | HSD ( $\delta$ -protonated; HID) | 33, 47, 55, 103, 151, 158, 177, 248, 327, 343, 351 | CHARMM-GUI/force-field assignment at pH 7.4 |

Table S3. Docking pose quality check (YASARA; top two retained poses per ligand).

Notes: Docking score and dissociation constants are taken from YASARA docking logs (Bind.energy and  $K_d$ ). Geometric plausibility metrics were computed from the exported PDB structures: min dist to Fe = minimum heavy-atom distance between ligand (UNL) and heme iron (HEM-Fe); min steric dist = minimum heavy-atom distance between ligand and receptor (protein + heme, excluding waters); clash is flagged when min steric dist < 2.0 Å; contact residues count unique protein residues with any heavy atom within 4.0 Å of ligand heavy atoms.

| Ligand | Pose | Bind.energy (kcal/mol) | $K_d$ (pM) | min dist to Fe (Å) | min steric dist (Å) | clash (<2.0 Å) | contact residues ( $\leq 4$ Å) |
|--------|------|------------------------|------------|--------------------|---------------------|----------------|--------------------------------|
| EST    | 001  | 11.541                 | 3470.0427  | 7.7747             | 3.1894              | 0              | 7                              |
| EST    | 002  | 11.541                 | 3470.0427  | 9.9945             | 3.0403              | 0              | 4                              |
| AND    | 001  | 12.391                 | 826.5641   | 8.0845             | 3.2426              | 0              | 6                              |
| AND    | 002  | 12.391                 | 826.5641   | 10.2721            | 2.8661              | 0              | 6                              |
| TES    | 001  | 12.454                 | 743.1851   | 7.7738             | 3.1950              | 0              | 6                              |
| TES    | 002  | 12.454                 | 743.1851   | 10.4017            | 3.1373              | 0              | 6                              |

Table S4. Docking score ranking for the three docked steroid ligands (AND, EST, and TES) from YASARA logs (top 10 runs per ligand).

Notes: PIY is not listed because the crystallographic PIY pose from PDB 3NC7 was used directly and was not subjected to redocking. Values were extracted directly from the YASARA docking log files. Bind.energy is reported by YASARA as the docking binding-energy score (kcal/mol). N\_contact\_residues refers to the contact count reported in the YASARA docking log and is not directly equivalent to the geometric contact count listed in Table S3.

| Ligand | Run | Bind.energy (kcal/mol) | $K_d$ (pM) | N_contact_residues (log) |
|--------|-----|------------------------|------------|--------------------------|
| AND    | 001 | 12.391                 | 826.5641   | 1                        |
| AND    | 002 | 12.391                 | 826.5641   | 1                        |
| AND    | 003 | 12.111                 | 1325.9260  | 1                        |
| AND    | 004 | 12.111                 | 1325.9260  | 1                        |
| AND    | 005 | 11.965                 | 1696.4408  | 1                        |
| AND    | 006 | 11.965                 | 1696.4408  | 1                        |

|     |     |        |            |   |
|-----|-----|--------|------------|---|
| AND | 007 | 11.767 | 2369.5979  | 1 |
| AND | 008 | 11.767 | 2369.5979  | 1 |
| AND | 009 | 11.309 | 5133.2578  | 1 |
| AND | 010 | 11.309 | 5133.2578  | 1 |
| EST | 001 | 11.541 | 3470.0427  | 1 |
| EST | 002 | 11.541 | 3470.0427  | 1 |
| EST | 003 | 11.362 | 4694.0054  | 1 |
| EST | 004 | 11.362 | 4694.0054  | 1 |
| EST | 005 | 11.144 | 6781.7173  | 1 |
| EST | 006 | 11.144 | 6781.7173  | 1 |
| EST | 007 | 10.854 | 11064.0088 | 1 |
| EST | 008 | 10.854 | 11064.0088 | 1 |
| EST | 009 | 10.669 | 15118.8691 | 1 |
| EST | 010 | 10.669 | 15118.8691 | 1 |
| TES | 001 | 12.454 | 743.1851   | 1 |
| TES | 002 | 12.454 | 743.1851   | 1 |
| TES | 003 | 12.027 | 1527.8900  | 1 |
| TES | 004 | 12.027 | 1527.8900  | 1 |
| TES | 005 | 11.702 | 2644.3582  | 1 |
| TES | 006 | 11.702 | 2644.3582  | 1 |
| TES | 007 | 11.518 | 3607.3979  | 1 |
| TES | 008 | 11.518 | 3607.3979  | 1 |
| TES | 009 | 10.968 | 9127.4482  | 1 |
| TES | 010 | 10.968 | 9127.4482  | 1 |

Table S5. State fractions (%) and gating indices (CR, PI) on the  $d_{\text{mouth}}/d_{\text{cover}}$  plane from 0–1000 ns using pooled (global) k-means centroids and nearest-centroid assignment.  $CR = P_{\text{Closed}} / P_{\text{Open}}$ ;  $PI = (P_{\text{Open}} + P_{\text{Closed}})/P_{\text{Intermediate}}$ . Higher CR indicates closed enrichment; higher PI indicates intermediate depletion (end-state polarization).

| System | Open | Intermediate | Closed | Closedness Ratio | Polarization Index |
|--------|------|--------------|--------|------------------|--------------------|
| APO    | 4    | 95.8         | 0.1    | 0.03             | 0.04               |
| PIY    | 4.9  | 95           | 0.1    | 0.02             | 0.05               |
| AND    | 12.7 | 87.2         | 0.1    | 0.01             | 0.15               |
| EST    | 97.7 | 1.9          | 0.4    | <0.01            | 51.36              |
| TES    | 26.7 | 29.5         | 43.8   | 1.64             | 2.39               |

Table S6. MSM-derived macrostate populations and kinetics (macrostates mapped by pooled Fig. 6 centroids).

System Open (%) Intermediate (%) Closed (%) MFPT (Closed → Open)

|     | System Open (%) | Intermediate (%) | Closed (%) | MFPT (Closed → Open) |
|-----|-----------------|------------------|------------|----------------------|
| APO | 3.63            | 96.28            | 0.09       | 471.42               |
| AND | 11.92           | 88.05            | 0.03       | 168.98               |
| EST | 97.57           | 2.11             | 0.32       | 29.31                |
| PIY | 4.68            | 95.25            | 0.06       | 438.38               |
| TES | 27.11           | 29.39            | 43.50      | 326.67               |

Table S7. Transient ion proximity to the immediate catalytic region before MM-PBSA ion stripping

| System | Sampled frames | Na <sup>+</sup> within 5 Å, n (%) | Cl <sup>-</sup> within 5 Å, n (%) | Max simultaneous Na <sup>+</sup> | Max simultaneous Cl <sup>-</sup> | Min Na <sup>+</sup> distance (Å) | Min Cl <sup>-</sup> distance (Å) |
|--------|----------------|-----------------------------------|-----------------------------------|----------------------------------|----------------------------------|----------------------------------|----------------------------------|
| AND    | 1001           | 304 (30.37)                       | 124 (12.39)                       | 3                                | 2                                | 2.106                            | 2.181                            |
| PIY    | 1001           | 254 (25.37)                       | 132 (13.19)                       | 4                                | 2                                | 2.170                            | 2.166                            |
| EST    | 1001           | 285 (28.47)                       | 209 (20.88)                       | 3                                | 2                                | 2.194                            | 2.081                            |
| TES    | 1001           | 212 (21.18)                       | 186 (18.58)                       | 3                                | 2                                | 2.072                            | 2.025                            |

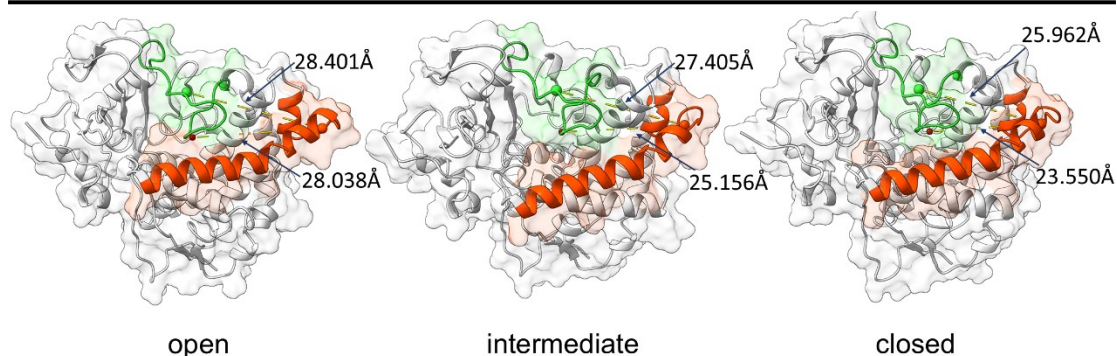

Figure S1. Apo CYP134A1 (CypX) open–intermediate–closed conformations highlighting mouth–cover gating.

Representative apo structures for the open, intermediate, and closed states are shown as a light-gray cartoon with a semi-transparent surface. The mouth (B'/C rim, residues 55–90) is colored orange and the FG cover (residues 173–209) is colored green. Distances (Å) report the mouth opening (C $\alpha$  centroid distance for 55–90) and the FG cover closure (FG-loop centroid, residues 198–203, to

heme Fe).

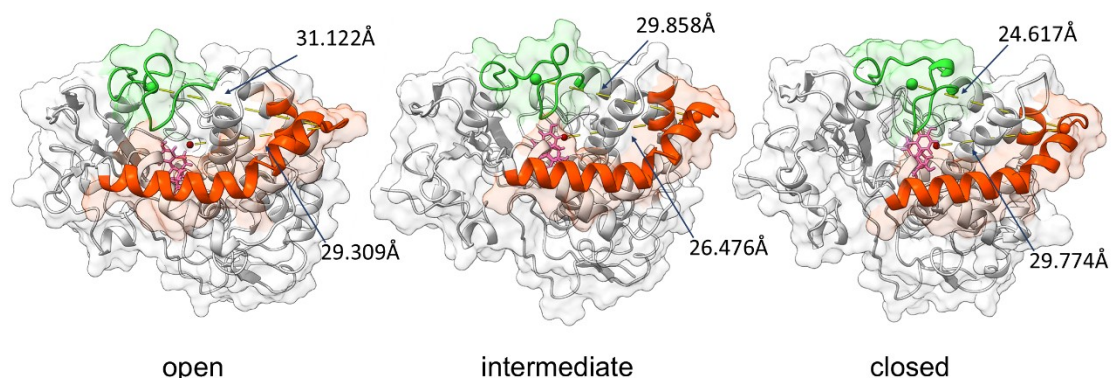

Figure S2. EST-bound CYP134A1 (CypX) open–intermediate–closed conformations highlighting mouth–cover gating.

Representative structures from the EST complex trajectory are shown for the open, intermediate, and closed states (light-gray cartoon with semi-transparent surface). The mouth (B'/C rim, residues 55–90) is colored orange and the FG cover (residues 173–209) is colored green; the EST ligand is shown as hotpink sticks. Distances (Å) report the mouth opening (Ca centroid distance for residues 55–90) and FG cover closure (FG-loop centroid, residues 198–203, to heme Fe).

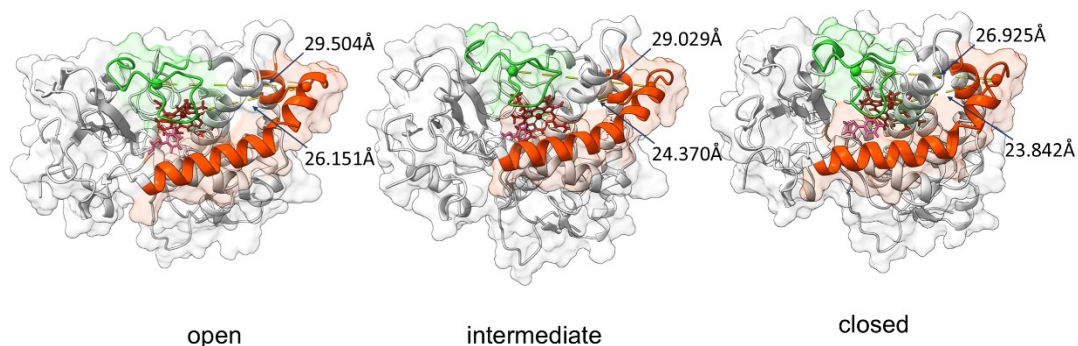

Figure S3. PIY-bound CYP134A1 (CypX) open–intermediate–closed conformations highlighting mouth–cover gating.

Representative structures from the PIY complex trajectory are shown for the open, intermediate, and closed states (light-gray cartoon with semi-transparent surface). The mouth (B'/C rim, residues 55–90) is colored orange and the FG cover (residues 173–209) is colored green; the PIY ligand is shown as hotpink sticks. Distances (Å) report the mouth opening (Ca centroid distance for

residues 55–90) and FG cover closure (FG-loop centroid, residues 198–203, to heme Fe).

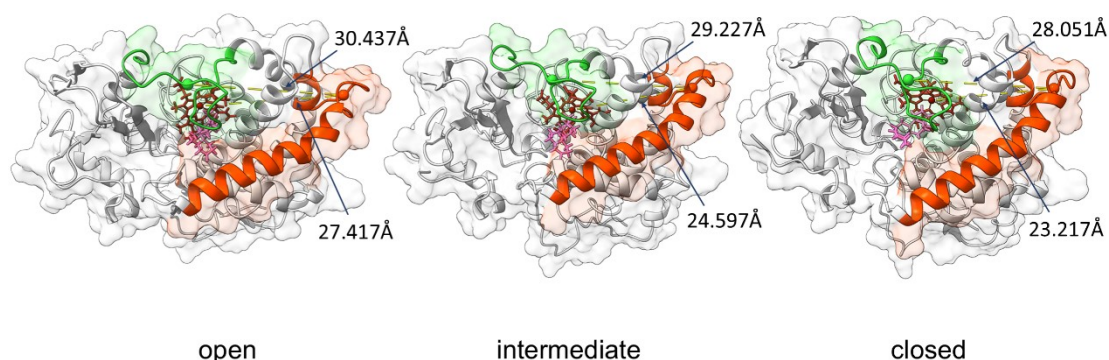

Figure S4. AND-bound CYP134A1 (CypX) open–intermediate–closed conformations highlighting mouth–cover gating.

Representative structures from the AND complex trajectory are shown for the open, intermediate, and closed states (light-gray cartoon with semi-transparent surface). The mouth (B'/C rim, residues 55–90) is colored orange and the FG cover (residues 173–209) is colored green; the AND ligand is shown as hotpink sticks. Distances (Å) report the mouth opening (Ca centroid distance for residues 55–90) and FG cover closure (FG-loop centroid, residues 198–203, to heme Fe).

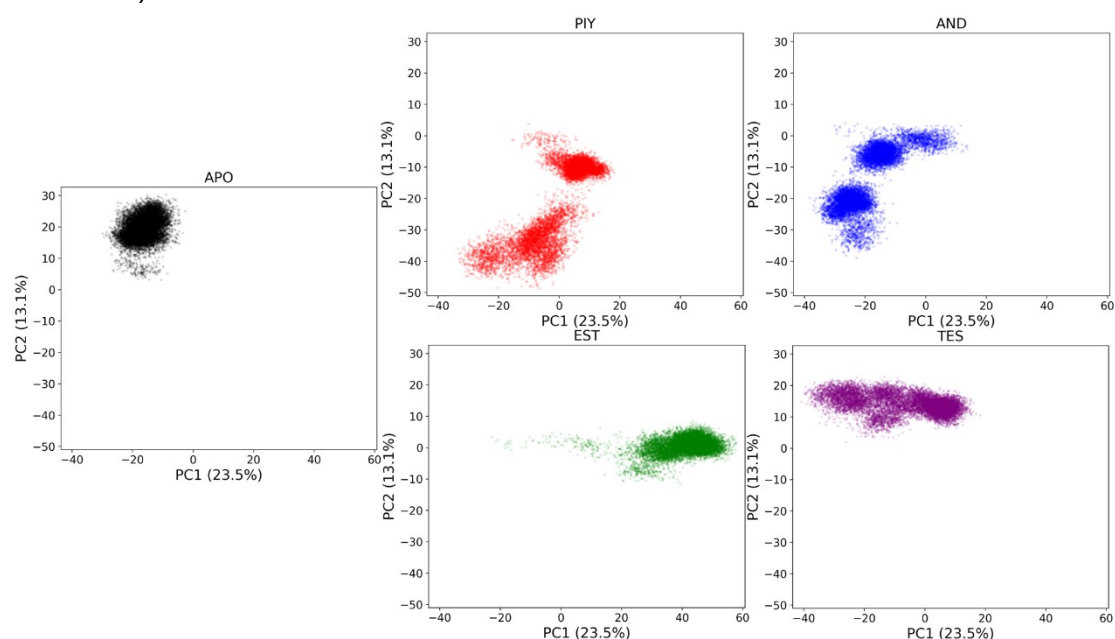

Figure S5. System-separated PCA distributions for the five simulated CypX ensembles.

Principal component analysis (PCA) projections of the pooled trajectories are shown separately for the APO, PIY, AND, EST, and TES systems in the PC1–PC2 space. Each point represents one sampled frame projected onto the first two principal components, using the same eigenvector basis and the same axis ranges as in the combined PCA plot shown in the main text. Colors are consistent with the main figures: APO, black; PIY, red; AND, blue; EST, green; TES, purple. These system-separated plots were included to facilitate clearer inspection of the conformational distributions sampled by each individual ensemble.
