# Supplementary material
Source: Royal Society of Chemistry journal article supplement (doi:10.1039/d5cp04574f)

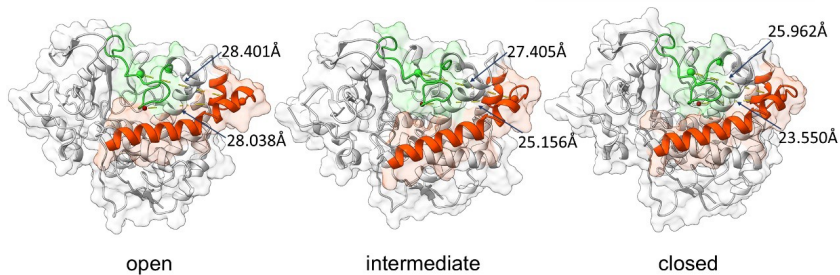

Supplement: d5cp04574f1.pdf [file d5cp04574f1.pdf]

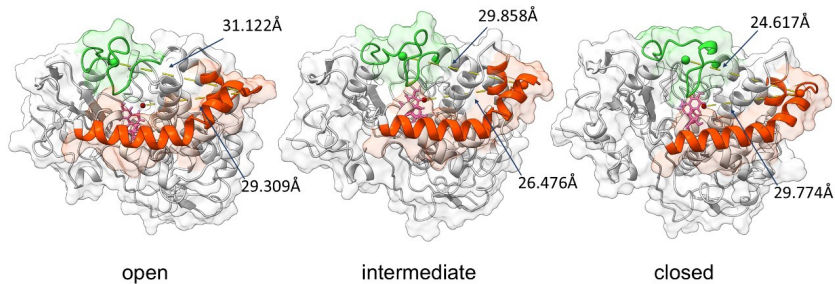

Supplement: d5cp04574f2.pdf [file d5cp04574f2.pdf]

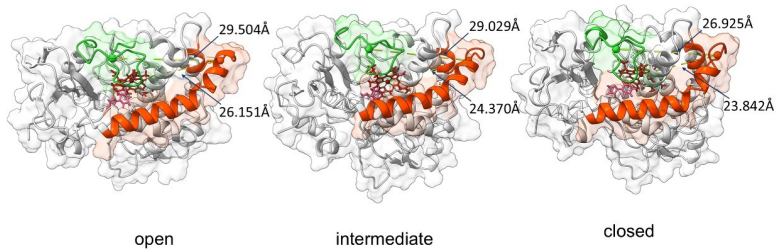

Supplement: d5cp04574f3.pdf [file d5cp04574f3.pdf]

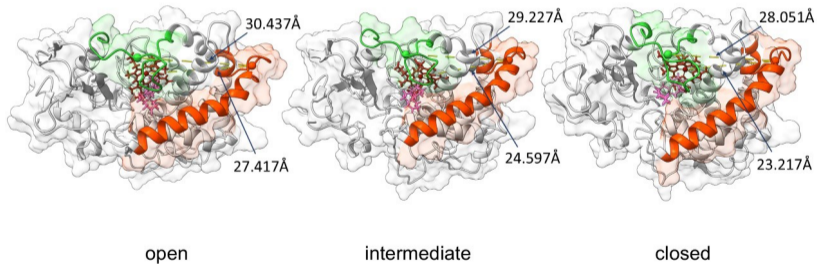

Supplement: d5cp04574f4.pdf [file d5cp04574f4.pdf]

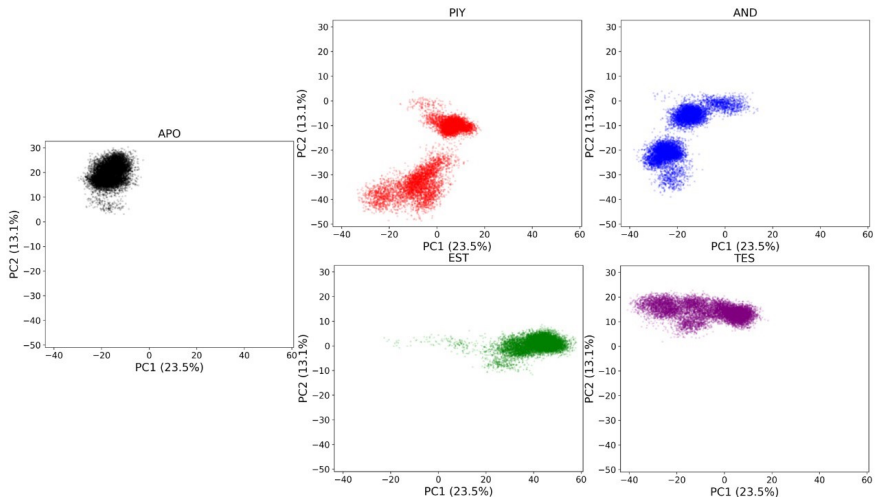

Supplement: d5cp04574f5.pdf [file d5cp04574f5.pdf]
